# Supplementary material
Source: PubMed Central journal article supplement (PMC2799813)
Supplement: 0905777106_0905777106SI.pdf [file 0905777106_0905777106SI.pdf]

# Supporting Information

Garwicz et al. 10.1073/pnas.0905777106

## SI Text

**Reliability of Data on Adult Brain Mass.** Data on adult brain mass for primates, rodents, carnivores, the elephant, and common domestic species were found documented in more than one study. For these species, the values in Table S2 were selected from a total of 58 values from 10 studies and represented, for a given species, the largest sample size or, if the underlying material did not differ significantly in that respect, the median value. The deviation of the remaining 43 values from the values in Table S2 averaged <10%, with a symmetrical distribution above and below the values used. Hence, although the main reference (1) dates 30 years back, data are representative. Because data on the horse brain showed a substantial variation and an asymmetrical distribution, the mean value was calculated for this species and used instead of the median value.

**Reliability of Data on Walking Onset.** Walking onset refers here to the earliest spontaneously occurring quadrupedal walking

(which is palmigrade for nonhuman primates) except for the bipedal gait of man. For most species, the data on walking onset were obtained from original papers explicitly addressing issues of locomotor development. For rodents and carnivores, the timing of walking onset was typically indicated by a dramatic increase in length of path covered in the open field resulting from the change in locomotor efficiency at the transition between crawling and walking, given at a temporal resolution of days. In most cases, this timing was supported by other data based on detailed quantitative analysis of step cycle parameters in the course of development. For nonhuman primates, the timing was often given in descriptive terms at a somewhat lower level of temporal resolution, typically in weeks. Walking onset for all ungulates was taken to occur on postnatal day 1.

1. Sacher GA, Staffeldt EF (1974) Relation of gestation time to brain weight for placental mammals: Implications for the theory of vertebrate growth. *Am Nat* 108:593–615.

2. Felsenstein J (1985) Phylogenies and the comparative method. *Am Nat* 125:1–15.





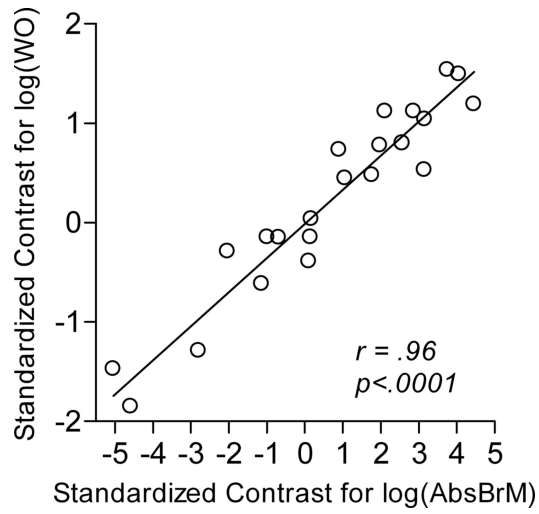

**Fig. S3.** Evaluating the influence of phylogenetic relatedness on the statistical significance of the findings illustrated in Fig. 4 *Right*. Number of contrasts: 22 (open circles). Solid line: Model II linear regression (reduced major axis). The Pearson correlation coefficient was 0.959 (adj  $R^2 = 0.919$ ,  $F_{(1,20)} = 239.4$ ,  $P < 0.0001$ ), showing that the effects of phylogenetic relatedness were very minor.

**Table S1. Taxonomy of species included in the sample**

| Lay term       | Order/suborder          | Family          | Genus/species                 |
|----------------|-------------------------|-----------------|-------------------------------|
| Elephant shrew | Macroscelidea           | Macroscelididae | <i>Elephantulus myurus</i>    |
| Aardvark       | Tubulidentata           | Orycteropodidae | <i>Orycteropus afer</i>       |
| Elephant       | Proboscidea             | Elephantidae    | <i>Loxodonta africana</i>     |
| Armadillo      | Cingulata               | Dasypodidae     | <i>Dasypus novemcinctus</i>   |
| Chimpanzee     | Primates                | Hominidae       | <i>Pan troglodytes</i>        |
| Human          | Primates                | Hominidae       | <i>Homo sapiens</i>           |
| Gorilla        | Primates                | Hominidae       | <i>Gorilla gorilla</i>        |
| Macaque        | Primates                | Cercopithecidae | <i>Macaca mulatta</i>         |
| Tree shrew     | Scandentia              | Tupaiaidae      | <i>Tupaia belangeri</i>       |
| Rat            | Rodentia/Myomorpha      | Muridae         | <i>Rattus norvegicus</i>      |
| Mouse          | Rodentia/Myomorpha      | Muridae         | <i>Mus musculus</i>           |
| Hamster        | Rodentia/Myomorpha      | Cricetidae      | <i>Mesocricetus auratus</i>   |
| Guinea pig     | Rodentia/Hystricomorpha | Caviidae        | <i>Cavia porcellus</i>        |
| Ferret         | Carnivora/Caniformia    | Mustelidae      | <i>Mustela putorius furo</i>  |
| Dog            | Carnivora/Caniformia    | Canidae         | <i>Canis lupus familiaris</i> |
| Cat            | Carnivora/Feliformia    | Felidae         | <i>Felis catus</i>            |
| Horse          | Perissodactyla          | Equidae         | <i>Equus caballus</i>         |
| Sheep          | Artiodactyla/Ruminantia | Bovidae         | <i>Ovis aries</i>             |
| Cow            | Artiodactyla/Ruminantia | Bovidae         | <i>Bos taurus</i>             |
| Chital         | Artiodactyla/Ruminantia | Cervidae        | <i>Axis axis</i>              |
| Elk            | Artiodactyla/Ruminantia | Cervidae        | <i>Cervus canadensis</i>      |
| Hippopotamus   | Artiodactyla/Suiformes  | Hippopotamidae  | <i>Hippopotamus amphibius</i> |
| Camel          | Artiodactyla/Tylopoda   | Camelidae       | <i>Camelus dromedarius</i>    |
| Hedgehog       | Erinaceomorpha          | Erinaceidae     | <i>Erinaceus europaeus</i>    |

Species are ordered as in Fig. 1, main text. Lay terms in the left column are used in text, Figs. 1 and 4, and [Table S2](#).

Table S2. Database for multiple-regression model

| Species (lay term) | AbsBrM, g  | NeoBrM (1), g | BoM, g        | Gest., days | WO, days |      | Pre/Alt | HSP       |
|--------------------|------------|---------------|---------------|-------------|----------|------|---------|-----------|
|                    |            |               |               |             | PN       | PC   |         |           |
| Elephant shrew     | 1.37 (1)   | 0.58          | 64 (1)        | 46 (1)      | 1 (2)    | 47   | Pre     | Plant.    |
| Aardvark           | 72 (3)     | —             | 52,000 (3)    | 225 (3)     | 14 (3)   | 239  | Alt     | Plant.    |
| Elephant           | 4,480 (1)  | 1,650         | 2,750,000 (1) | 655 (1)     | 1        | 656  | Pre     | Nonplant. |
| Armadillo          | 12 (1)     | 3.5           | 3,700 (1)     | 120 (1)     | 1 (2)    | 121  | Pre     | Plant.    |
| Chimpanzee         | 382 (4)    | 128           | 45,000 (1)    | 230 (1)     | 153 (5)  | 383  | Pre     | Plant.    |
| Human              | 1,350 (6)  | 335           | 65,000 (1)    | 270 (1)     | 357 (7)  | 627  | Pre     | Plant.    |
| Gorilla            | 500 (6)    | 227           | 140,000 (1)   | 265 (1)     | 183 (5)  | 448  | Pre     | Plant.    |
| Macaque            | 93.8 (8)   | 55            | 7,340 (1)     | 165 (9)     | 61 (10)  | 226  | Pre     | Plant.    |
| Tree shrew         | 3.15 (1)   | 0.53          | 150 (1)       | 46 (1)      | 21 (11)  | 67   | Alt     | Plant.    |
| Rat                | 2 (6)      | 0.28          | 339 (1)       | 21.5 (9)    | 15 (12)  | 36.5 | Alt     | Plant.    |
| Mouse              | 0.45 (1)   | 0.09          | 24 (1)        | 18.5 (9)    | 11 (13)  | 29.5 | Alt     | Plant.    |
| Hamster            | 1.12 (1)   | 0.06          | 125 (1)       | 15.5 (9)    | 13 (14)  | 28.5 | Alt     | Plant.    |
| Guinea pig         | 4 (15)     | 2.52          | 971 (1)       | 65 (16)     | 1 (17)   | 66   | Pre     | Plant.    |
| Ferret             | 7.1 (18)   | —             | 1,800 (2)     | 41 (9)      | 35 (19)  | 76   | Alt     | Plant.    |
| Cat                | 28.4 (1)   | 5.6           | 2,500 (1)     | 65 (9)      | 32 (20)  | 97   | Alt     | Nonplant. |
| Dog                | 70.2 (1)   | 6.8           | 8,480 (1)     | 63 (1)      | 49 (21)  | 112  | Alt     | Nonplant. |
| Horse              | 585 (1, 6) | 368           | 484,000 (1)   | 330 (1)     | 1        | 331  | Pre     | Nonplant. |
| Sheep              | 140 (6)    | 52            | 48,800 (1)    | 150 (1)     | 1        | 151  | Pre     | Nonplant. |
| Cow                | 456 (1)    | 199           | 520,000 (1)   | 280 (1)     | 1        | 281  | Pre     | Nonplant. |
| Chital             | 219 (1)    | 78.6          | 88,500 (1)    | 218 (1)     | 1        | 219  | Pre     | Nonplant. |
| Elk                | 435 (1)    | 203           | 200,000 (1)   | 255 (1)     | 1        | 256  | Pre     | Nonplant. |
| Hippopotamus       | 590 (1)    | 195           | 1,400,000 (1) | 240 (1)     | 1        | 241  | Pre     | Nonplant. |
| Camel              | 762 (6)    | —             | 690,000 (2)   | 395 (22)    | 1        | 396  | Pre     | Nonplant. |
| Hedgehog           | 3.5 (1)    | 0.313         | 928 (1)       | 40 (2)      | 14 (23)  | 54   | Alt     | Plant.    |

Species are ordered according to Fig. 1, main text. AbsBrM, absolute brain mass; NeoBrM, neonatal brain mass; brain advancement at birth = NeoBrM/AbsBrM; BoM, body mass; relative brain mass = adult brain mass/body mass; Gest., gestation time; WO, time to walking onset; PN, postnatal; PC, postconception; walking onset PC = gestation time + walking onset PN; Pre, precocial; Alt, altricial; HSP, hindlimb standing position (lower extremity in humans), differentiates between species that can assume a plantigrade hindlimb standing position (Plant.) and species that cannot (Nonplant.). Of the species listed as "plantigrade," only chimpanzees, gorillas, and humans actually walk with plantigrade posture. The other plantigrade species walk and run with digitigrade posture in which the heel does not contact, or apply force to, the substrate. Elephants are listed as nonplantigrade because their heel is supported above the ground by a large connective tissue pad. During walking force transmission through this pad makes elephants mechanically plantigrade.

- Sacher GA, Staffeldt EF (1974) Relation of gestation time to brain weight for placental mammals: Implications for the theory of vertebrate growth. *Am Nat* 108:593–615.
- Hutchins M, et al., eds (2003) *Grzimek's Animal Life Encyclopedia. Mammals I–V* (Gale, Detroit), 2nd Ed, Vols 13–16; cf. University of Michigan Museum of Zoology, Animal Diversity Web, available at <http://animaldiversity.ummz.umich.edu/site/index.html>.
- Knöthig J (2005) Biology of the Aardvark (*Orycteropus afer*). PhD thesis (Ruprecht-Karls-University, Heidelberg).
- DeSilva J, Lesnik J (2006) Chimpanzee neonatal brain size: Implications for brain growth in *Homo erectus*. *J Hum Evol* 51:207–212.
- Doran DM (1997) Ontogeny of locomotion in mountain gorillas and chimpanzees. *J Hum Evol* 32:323–344.
- Roth G, Dicke U (2005) Evolution of the brain and intelligence. *Trends Cogn Sci* 9:250–257.
- Bayley N (1993) *Bayley Scales of Infant Development* (Psychological Corporation, New York).
- Marino L (1998) A comparison of encephalization between odontocete cetaceans and anthropoid primates. *Brain Behav Evol* 51:230–238.
- Clancy B, Darlington RB, Finlay BL (2001) Translating developmental time across mammalian species. *Neuroscience* 105:7–17.
- Dunbar DC, Badam GI (1998) Development of posture and locomotion in free-ranging primates. *Neurosci Biobehav Rev* 22:541–546.
- Personal communication from Julie Heiner (David Fitzpatrick's laboratory, Duke University Medical Center, Durham, NC) and M.C.; cf. Martin RD (1968) *Z Tierpsychol* 25:505–532.
- Altman J, Sudarshan K (1975) Postnatal development of locomotion in the laboratory rat. *Anim Behav* 23:896–920.
- Fox WM (1965) Reflex ontogeny and behavioural development of the mouse. *Anim Behav* 13:234–241.
- Da Silva VA, Smart JL, Freire EM, Paumgartten FJR (1989) Neurobehavioural development of the golden hamster. *Neurotoxicol Teratol* 11:105–111.
- Himwich WA (1962) Biochemical and neurophysiological development of the brain in the neonatal period. *Int Rev Neurobiol* 4:117–158.
- Clancy B, Finlay BL, Darlington RB, Anand KJ (2007) Extrapolating brain development from experimental species to humans. *Neurotoxicology* 28:931–937.
- Oakley DA, Plotkin HC (1975) Ontogeny of spontaneous locomotor activity in rabbit, rat and guinea pig. *J Comp Physiol Psychol* 89:267–273.
- Weiler E (1992) Seasonal changes in adult mammalian brain weight. *Naturwissenschaften* 79:274–276.
- Christensson M, Garwicz M (2005) Time course of postnatal motor development in ferrets: Ontogenetic and comparative perspectives. *Behav Brain Res* 158:231–242.
- Frederickson CJ, Frederickson MH (1979) Developmental changes in open-field behavior in the kitten. *Dev Psychobiol* 12:623–628.
- Czarkowska J (1983) Changes of some postural reflexes during the first postnatal weeks in the dog. *Acta Neurobiol Exp* 43:27–35.
- Skidmore JA (2003) The main challenges facing camel reproduction research in the 21st century. *Reprod Suppl* 61:37–47.
- Available at <http://hedgehogvalley.com/dev.html>.
